# Supplementary material
Source: PubMed Central journal article supplement (PMC5746871)
Supplement: NIHMS912381-supplement-Supp_Table.pdf [file NIHMS912381-supplement-Supp_Table.pdf]

| <b>Table 1: Tumor signal comparison</b> | <b>P†</b> |
|-----------------------------------------|-----------|
| Day 7                                   |           |
| Delta IL15 vs. CAR IL15                 | 0.8542    |
| Delta IL15 vs. CAR                      | 0.3583    |
| CAR IL15 vs. CAR                        | 0.0757    |
| Day 8                                   |           |
| Delta IL15 vs. CAR IL15                 | 0.0982    |
| Delta IL15 vs. CAR                      | 0.0235    |
| CAR IL15 vs. CAR                        | 0.1041    |
| Day 14                                  |           |
| Delta IL15 vs. CAR IL15                 | 0.0040    |
| Delta IL15 vs. CAR                      | 0.0040    |
| CAR IL15 vs. CAR                        | 0.1212    |
| Day 21                                  |           |
| Delta IL15 vs. CAR IL15                 | 0.0027    |
| Delta IL15 vs. CAR                      | 0.0059    |
| CAR IL15 vs. CAR                        | 0.0113    |
| Day 28                                  |           |
| Delta IL15 vs. CAR IL15                 | 0.0027    |
| Delta IL15 vs. CAR                      | 0.0059    |
| CAR IL15 vs. CAR                        | 0.3447    |
| Day 35                                  |           |
| Delta IL15 vs. CAR IL15                 | 0.0058    |
| Delta IL15 vs. CAR                      | 0.0133    |
| CAR IL15 vs. CAR                        | 0.0010    |
| Day 49                                  |           |
| CAR IL15 vs. CAR                        | 0.0058    |
| Day 63                                  |           |
| CAR IL15 vs. CAR                        | 0.0454    |
| Day 84                                  |           |
| CAR IL15 vs. CAR                        | 0.0234    |

†: Wilcoxon rank-sum test
